# Supplementary material
Source: PubMed Central journal article supplement (PMC5528962)

A

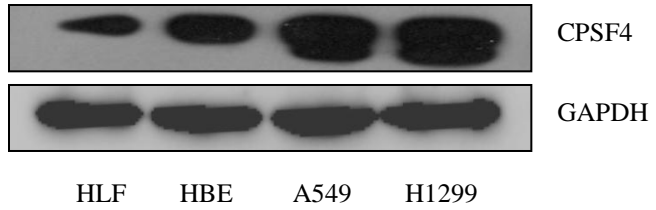

B

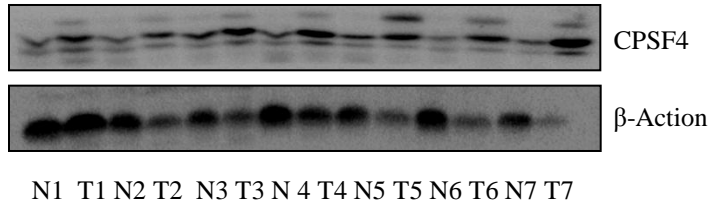

Supplement: MOL2-10-317-s002.pdf [file MOL2-10-317-s002.pdf]
